# Supplementary material for: Exploiting multiple percolation in two-terminal memristor to achieve a multitude of resistive states
Source: Royal Society of Chemistry journal article supplement (doi:10.1039/d1tc00987g), 2021-01-01
Supplement: d1tc00987g1.pdf [file d1tc00987g1.pdf]

## 5.6 Supplementary Information

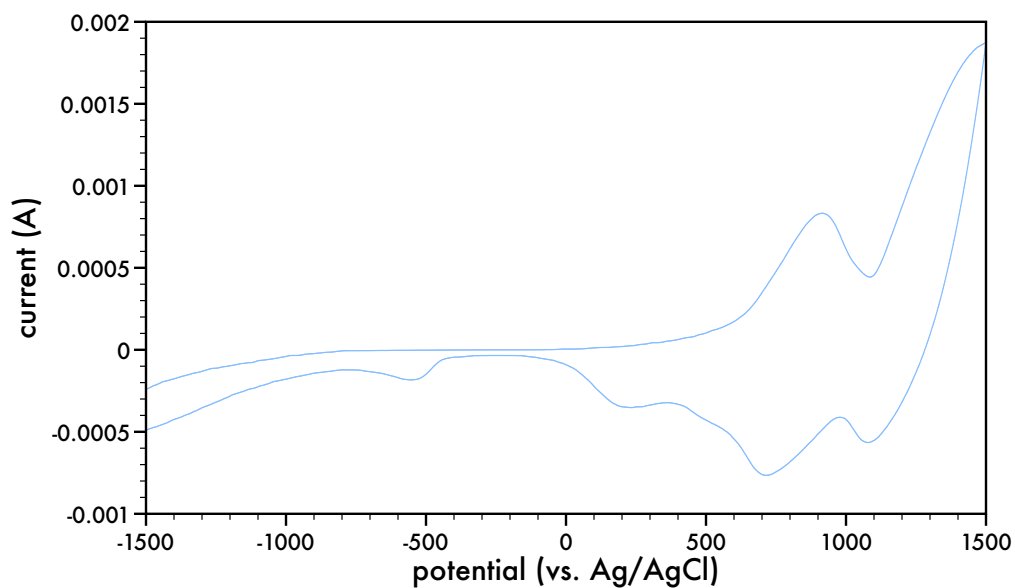

Figure 15: Extended range cyclic voltammograms for the oxidation of pC6DTP. Electrolyte was ACN / 0.1 M TBAPF<sub>6</sub> and scan rate was 100 mV/s.

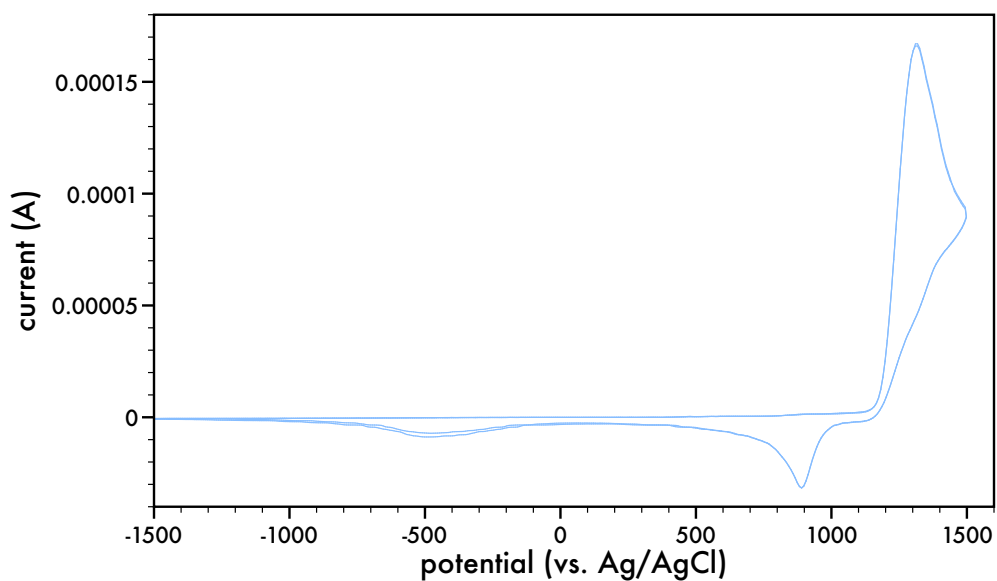

Figure 16: Cyclic voltammograms for H-carbazole. Electrolyte was ACN / 0.1 M TBAPF<sub>6</sub> and scan rate was 100 mV/s.

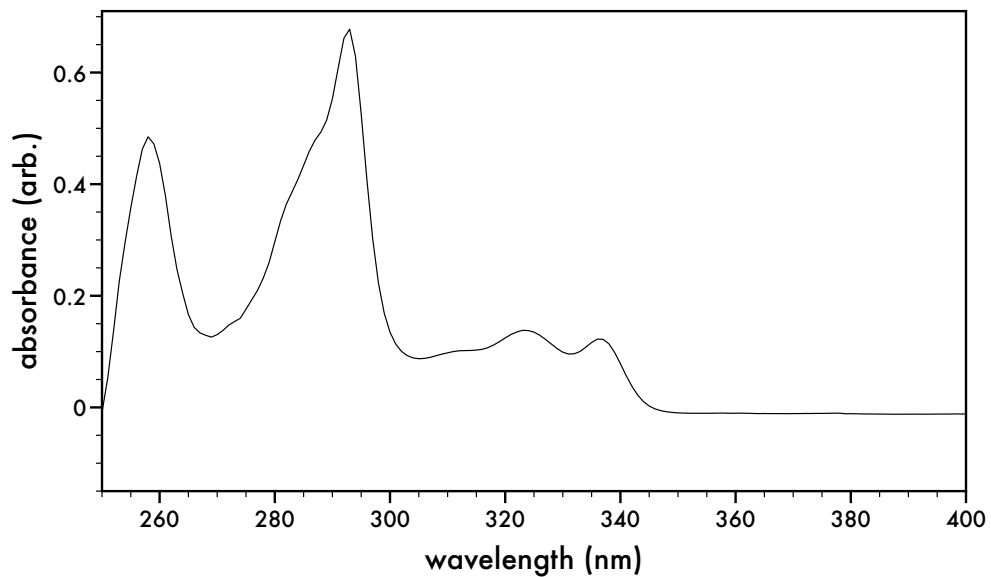

Figure 17: UV-Vis-NIR spectra of 9H-carbazole in  $10\mu\text{g/ml}$  THF solution.

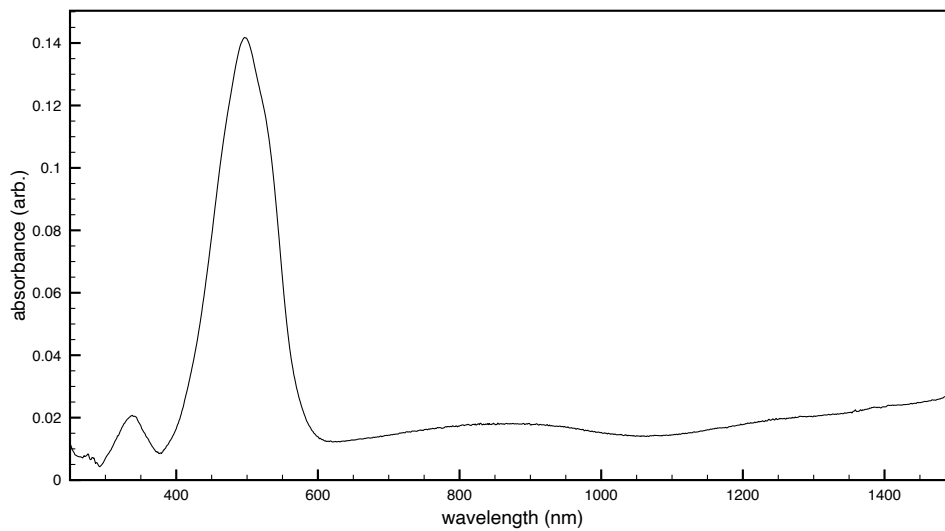

Figure 18: UV-Vis-NIR spectra of p6DPT in  $10\mu\text{g/ml}$  THF solution.

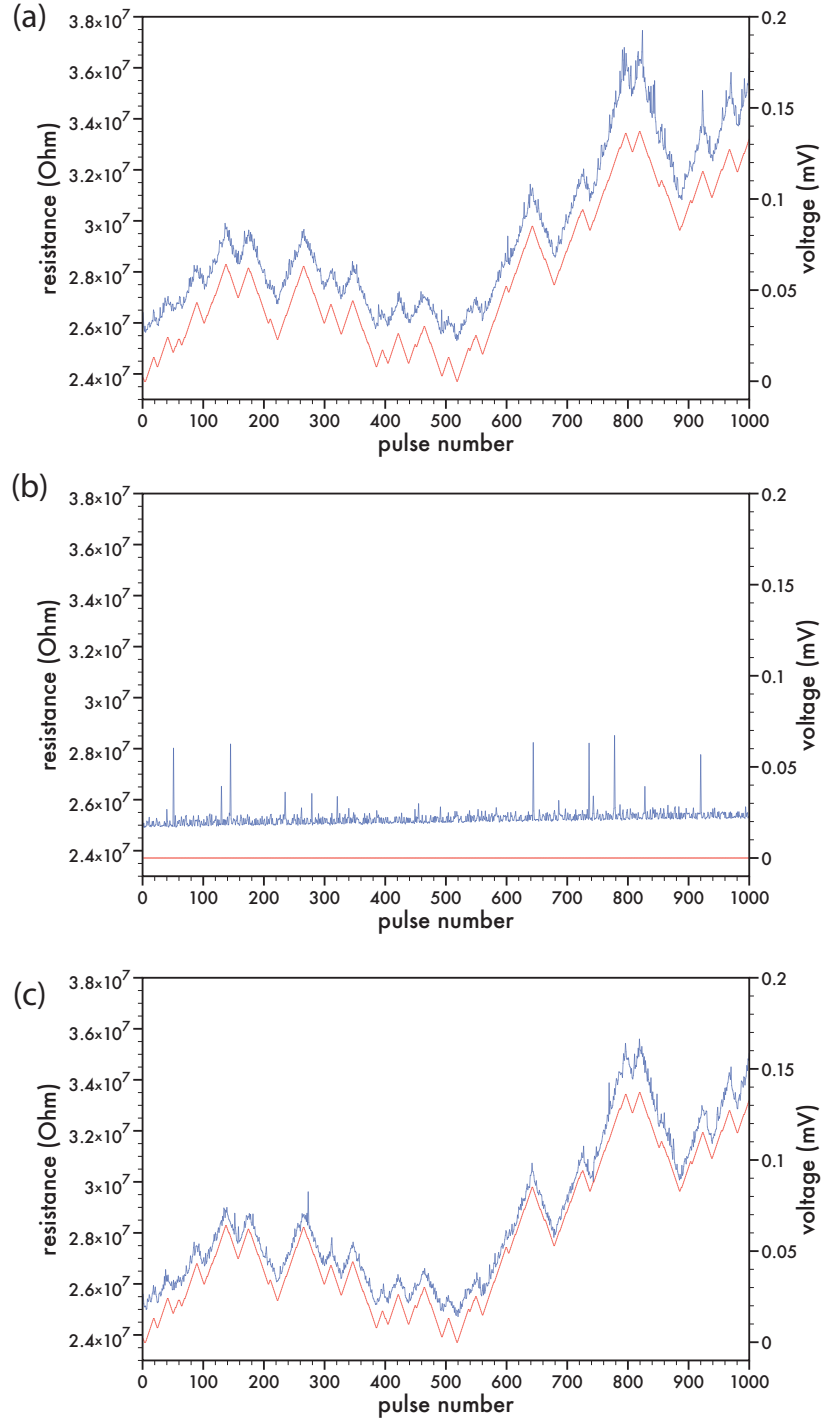

Figure 19: Cycled voltage profile (red) and resistance change (blue) with a “random” voltage profile applied to ITO/pC6DTP<sub>ox</sub>/Al memristor. **(a)** Cycle N°1: resistance (blue) response (10-cycle average) of device to non-zero (red) voltage profile; **(b)** Cycle N°2: resistance (blue) response (10-cycle average) of device to zeroed (red) voltage profile; and **(c)** Cycle N°3: resistance (blue) response (10-cycle average) of device to non-zero (red) voltage profile. The device was subjected to the potential profile in the form of a 67 ms long square wave pulse with a magnitude corresponding to a value stored in the potential profile, with the pulses being spaced 860 ms apart. A measuring 50 mV square wave pulse with 160 ms width was initiated 127 ms after the potential profile pulse.
